# Supplementary material for: Effect of charge transfer and periodicity on the magnetism of [Cr(Cp*)2][ETCE]
Source: Royal Society of Chemistry journal article supplement (doi:10.1039/c3ra47360k), 2014-01-01
Supplement: c3ra47360k1.pdf [file c3ra47360k1.pdf]

## Electronic Supplementary Information

### Effect of Charge Transfer and Periodicity on the Magnetism of [Cr(Cp\*)<sub>2</sub>][ETCE]

Tamal Goswami, Satadal Paul and Anirban Misra\*

Department of Chemistry, University of North Bengal, Siliguri 734013, West Bengal,  
India

\*Email: anirbanmisra@yahoo.com

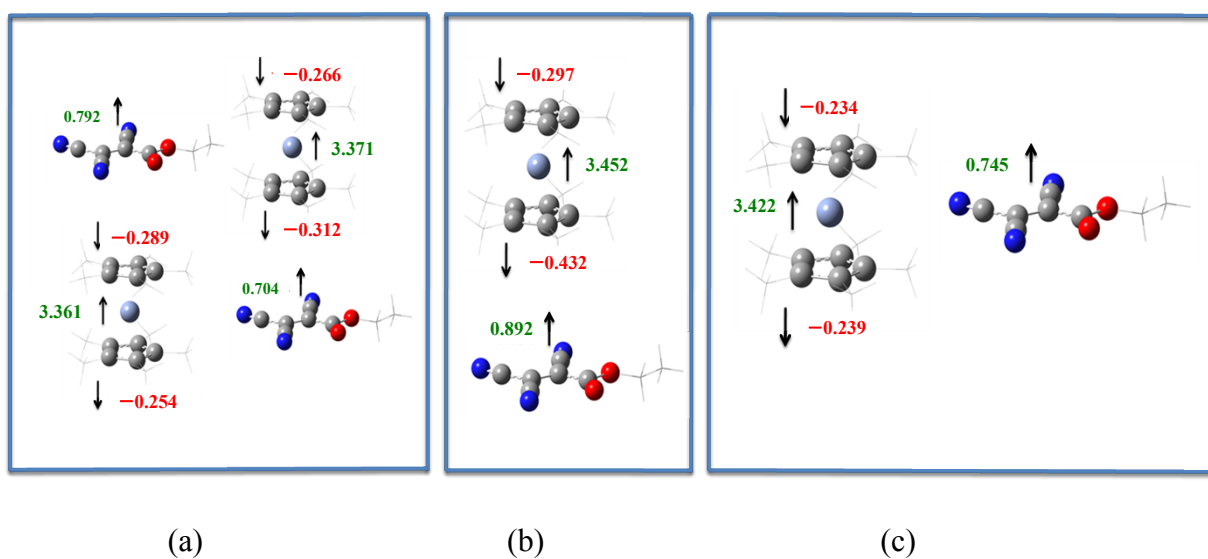

**Fig. S1** Spin populations of the high spin states plotted in (a) two dimensional array (b) V-pair and (c) H-pair of the donor-acceptor complex.

**Table S1** Energy comparison of triplet and quintet spin states in neutral  $[\text{Cr}^{\text{II}}(\text{Cp}^*)_2]$ 

| Level of Theory                                           | Energy difference between the quintet and triplet state in a.u. |
|-----------------------------------------------------------|-----------------------------------------------------------------|
| UBHandHLYP/6-311++G(d,p) with LANL2DZ as extrabasis on Cr | 0.005                                                           |
| CASSCF(6,8)/LANL2DZ                                       | 0.003                                                           |
| UBPW91/6-311++G(d,p) with LANL2DZ as extrabasis on Cr     | 0.042                                                           |
| UB3LYP/6-311++G(d,p) with LANL2DZ as extrabasis on Cr     | 0.028                                                           |

**Table S2** Spin populations at the vertical donor-acceptor stack in different functionals (percentage of HF exchange are given for each functional in the parenthesis)

| Functionals                                                                         | UBHandHLYP             | UBPW91                | UB3LYP                 | UPBEPBE               | UTPSSH                 |
|-------------------------------------------------------------------------------------|------------------------|-----------------------|------------------------|-----------------------|------------------------|
| <b>% of Hartree-Fock Exchange</b>                                                   | <b>50<sup>t1</sup></b> | <b>0<sup>t2</sup></b> | <b>20<sup>t1</sup></b> | <b>0<sup>t1</sup></b> | <b>10<sup>46</sup></b> |
| 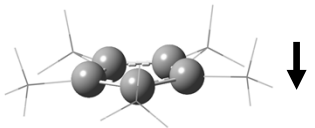 | -0.297                 | -0.250                | -0.249                 | -0.255                | -0.228                 |
|  | 3.452                  | 3.498                 | 3.423                  | 3.482                 | 3.465                  |
|  | -0.432                 | -0.385                | -0.373                 | -0.358                | -0.381                 |
|  | 0.892                  | 0.727                 | 0.790                  | 0.706                 | -0.829                 |
| <b>Magnetic exchange coupling constants (J) in cm<sup>-1</sup></b>                  | <b>511</b>             | <b>142</b>            | <b>137</b>             | <b>133</b>            | <b>408</b>             |

t1 A. Sorkin, M. A. Iron and D. G. Truhlar, *J. Chem. Theory Comput.*, 2008, 4, 307 and references therein.

t2 E. A. B. Kantchev, T. B. Norsten and M. B. Sullivan, *Org. Biomol. Chem.*, 2012, **10**, 6682.

46 D. A. Pantazis, V. Krewald, M. Orio and F. Neese, *Dalton Trans.*, 2010, **39**, 4959.

**Table S3** Variation in spin densities on the magnetic centers  $[\text{Cr}(\text{Cp}^*)_2]^+$  ( $\text{D}^+$ ) and  $[\text{ETCE}]^-$  ( $\text{A}^-$ ) and coupling constants in the V-pair with  $nk$  points ( $n = 0, 1, 2$ )

| Gamma ( $\Gamma$ ) point     | n=1                          | n=2                          |
|------------------------------|------------------------------|------------------------------|
|                              |                              |                              |
| $J = -7.072 \text{ cm}^{-1}$ | $J = -7.501 \text{ cm}^{-1}$ | $J = -9.297 \text{ cm}^{-1}$ |

**Table S4** Estimation of magnetic exchange coupling constant with the hybrid PBE0 functional (at PBE1PBE/LANL2DZ level) at **Gamma ( $\Gamma$ ) point** only.

| Spin state          | Energy in a.u. | $\langle S^2 \rangle^*$ | $J$ in $\text{cm}^{-1}$  |
|---------------------|----------------|-------------------------|--------------------------|
| High spin (quintet) | -1486.6654340  | 6.100961                | -107.24 $\text{cm}^{-1}$ |
| Low spin (triplet)  | -1486.6668841  | 3.133394                |                          |

\* The  $\langle S^2 \rangle$  values are obtained through unrestricted density functional approach. The unrestricted density functional calculation leads to the problem of spin contamination. Due to this spin contamination, the  $\langle S^2 \rangle$  value is found to be deviated from the exact value of 6.000.<sup>13, 29a</sup>

t3 (a) D. Bhattacharya and A. Misra, *J. Phys. Chem. A*, 2009, **113**, 5470; (b) S. Shil and A. Misra, *J. Phys. Chem. A*, 2010, **114**, 2022.  
29 (a) S. Paul and A. Misra, *J. Chem. Theory and Comput.*, 2012, **8**, 843.

**Fig. S2** Spin populations of the high-spin states at different functionals.

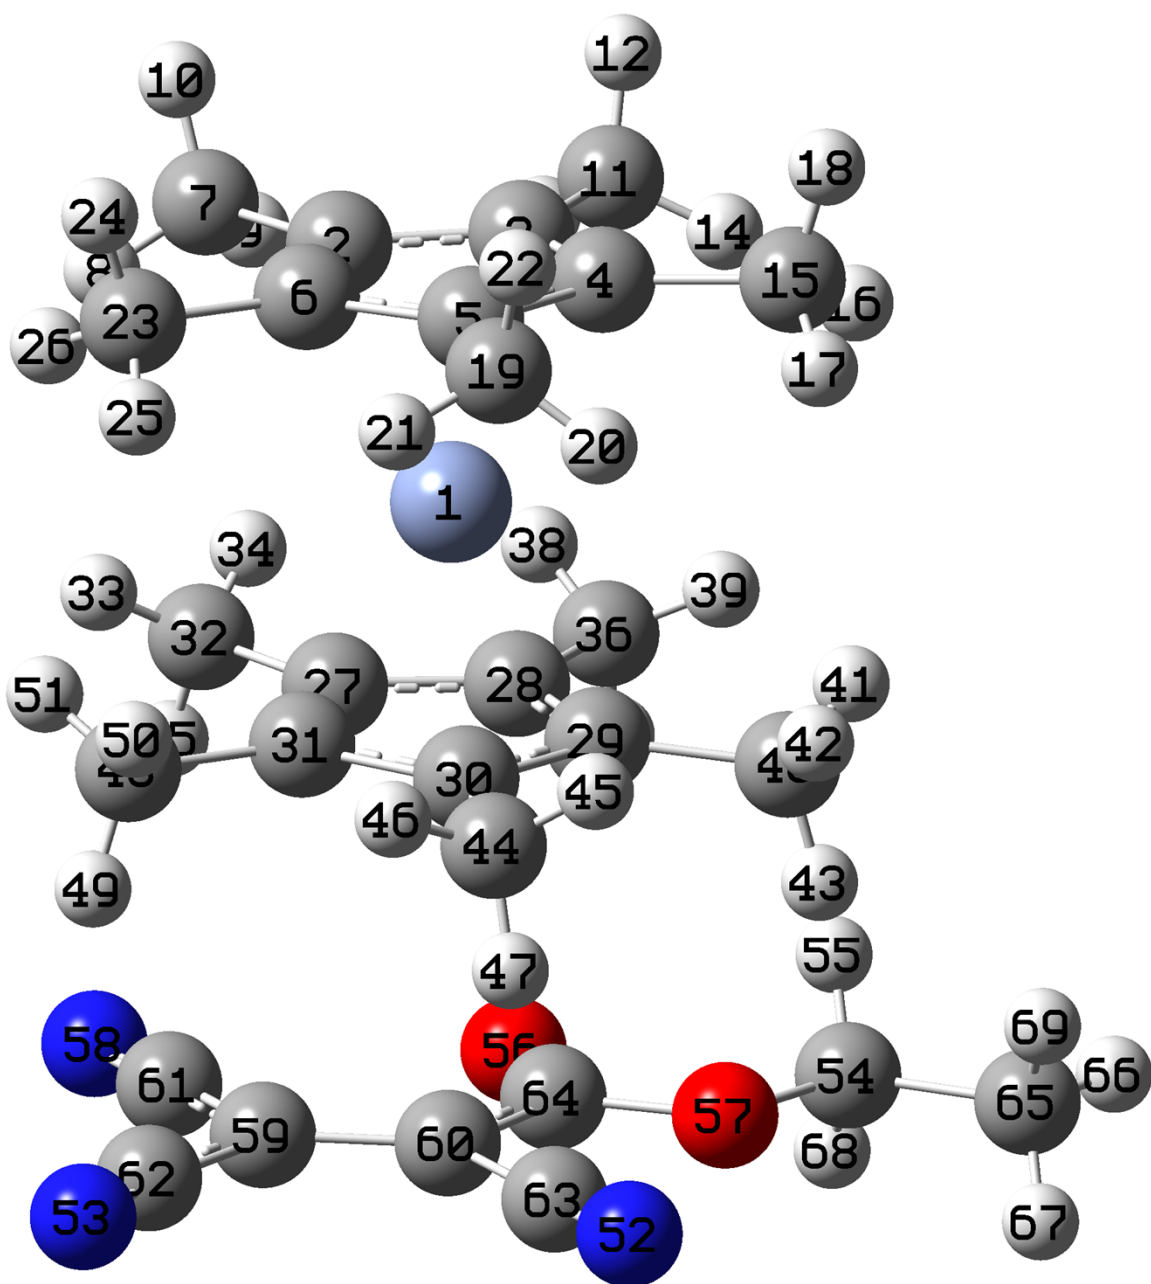

### Spin populations at UBHandHLYP:

Mulliken atomic spin densities:

|    |    | 1         |
|----|----|-----------|
| 1  | Cr | 3.452088  |
| 2  | C  | -0.075705 |
| 3  | C  | -0.063121 |
| 4  | C  | -0.045285 |
| 5  | C  | -0.052738 |
| 6  | C  | -0.060055 |
| 7  | C  | 0.015104  |
| 8  | H  | -0.000610 |
| 9  | H  | -0.000434 |
| 10 | H  | -0.000001 |
| 11 | C  | 0.018556  |
| 12 | H  | 0.000152  |
| 13 | H  | -0.000172 |
| 14 | H  | -0.001848 |
| 15 | C  | 0.030128  |
| 16 | H  | -0.001165 |
| 17 | H  | -0.001640 |
| 18 | H  | 0.000560  |
| 19 | C  | 0.029040  |
| 20 | H  | -0.002802 |
| 21 | H  | -0.000792 |
| 22 | H  | 0.000371  |
| 23 | C  | 0.016175  |
| 24 | H  | 0.000376  |
| 25 | H  | -0.001354 |
| 26 | H  | -0.000248 |
| 27 | C  | -0.108805 |
| 28 | C  | -0.062361 |
| 29 | C  | -0.021571 |
| 30 | C  | -0.120283 |
| 31 | C  | -0.119003 |
| 32 | C  | 0.045692  |
| 33 | H  | 0.000664  |
| 34 | H  | -0.002864 |
| 35 | H  | 0.004106  |
| 36 | C  | 0.082698  |
| 37 | H  | -0.006715 |
| 38 | H  | -0.000653 |
| 39 | H  | 0.001546  |
| 40 | C  | -0.001421 |
| 41 | H  | -0.002097 |

|    |   |           |
|----|---|-----------|
| 42 | H | -0.001464 |
| 43 | H | -0.003589 |
| 44 | C | 0.031833  |
| 45 | H | -0.000336 |
| 46 | H | -0.000281 |
| 47 | H | -0.001393 |
| 48 | C | 0.012664  |
| 49 | H | 0.006226  |
| 50 | H | -0.002422 |
| 51 | H | -0.001617 |
| 52 | N | 0.049340  |
| 53 | N | 0.167389  |
| 54 | C | -0.004473 |
| 55 | H | 0.002348  |
| 56 | O | 0.099409  |
| 57 | O | 0.017629  |
| 58 | N | 0.223715  |
| 59 | C | 0.484294  |
| 60 | C | 0.408096  |
| 61 | C | -0.231266 |
| 62 | C | -0.136223 |
| 63 | C | -0.085798 |
| 64 | C | 0.020922  |
| 65 | C | -0.000062 |
| 66 | H | -0.000062 |
| 67 | H | -0.000007 |
| 68 | H | 0.001710  |
| 69 | H | -0.000095 |

Sum of Mulliken spin densities= 4.00000

### Spin populations at UB3LYP:

Mulliken atomic spin densities:

|    |    |           |
|----|----|-----------|
|    |    | 1         |
| 1  | Cr | 3.422894  |
| 2  | C  | -0.070972 |
| 3  | C  | -0.069556 |
| 4  | C  | -0.015448 |
| 5  | C  | -0.028181 |
| 6  | C  | -0.065246 |
| 7  | C  | -0.031425 |
| 8  | H  | 0.000000  |
| 9  | H  | -0.000386 |
| 10 | H  | 0.000826  |
| 11 | C  | 0.002208  |
| 12 | H  | 0.000927  |
| 13 | H  | 0.001524  |

|    |   |           |
|----|---|-----------|
| 14 | H | -0.001862 |
| 15 | C | 0.043588  |
| 16 | H | 0.000101  |
| 17 | H | -0.001921 |
| 18 | H | 0.001478  |
| 19 | C | 0.046722  |
| 20 | H | -0.003167 |
| 21 | H | 0.000387  |
| 22 | H | 0.001457  |
| 23 | C | -0.001597 |
| 24 | H | 0.001098  |
| 25 | H | -0.001779 |
| 26 | H | 0.001529  |
| 27 | C | -0.109473 |
| 28 | C | -0.067410 |
| 29 | C | -0.018869 |
| 30 | C | -0.078382 |
| 31 | C | -0.099357 |
| 32 | C | 0.024940  |
| 33 | H | 0.000829  |
| 34 | H | -0.001121 |
| 35 | H | 0.005098  |
| 36 | C | 0.063182  |
| 37 | H | -0.002777 |
| 38 | H | -0.000737 |
| 39 | H | 0.001107  |
| 40 | C | 0.002044  |
| 41 | H | -0.001989 |
| 42 | H | -0.002236 |
| 43 | H | -0.002074 |
| 44 | C | 0.028099  |
| 45 | H | -0.001191 |
| 46 | H | -0.000268 |
| 47 | H | 0.000027  |
| 48 | C | 0.022861  |
| 49 | H | 0.008220  |
| 50 | H | -0.002275 |
| 51 | H | -0.001516 |
| 52 | N | 0.044192  |
| 53 | N | 0.138277  |
| 54 | C | -0.003654 |
| 55 | H | 0.002692  |
| 56 | O | 0.087095  |
| 57 | O | 0.025861  |
| 58 | N | 0.177527  |
| 59 | C | 0.406035  |
| 60 | C | 0.383816  |

|    |   |           |
|----|---|-----------|
| 61 | C | -0.148961 |
| 62 | C | -0.083880 |
| 63 | C | -0.064732 |
| 64 | C | 0.033645  |
| 65 | C | 0.000030  |
| 66 | H | -0.000055 |
| 67 | H | 0.000007  |
| 68 | H | 0.002159  |
| 69 | H | 0.000015  |

Sum of Mulliken spin densities= 4.00000

### Spin populations at UBPW91:

Mulliken atomic spin densities:

| 1  |    |           |
|----|----|-----------|
| 1  | Cr | 3.497814  |
| 2  | C  | -0.079002 |
| 3  | C  | -0.061431 |
| 4  | C  | -0.017070 |
| 5  | C  | -0.048917 |
| 6  | C  | -0.042221 |
| 7  | C  | 0.000966  |
| 8  | H  | 0.001083  |
| 9  | H  | -0.000175 |
| 10 | H  | 0.001815  |
| 11 | C  | 0.008819  |
| 12 | H  | 0.002314  |
| 13 | H  | 0.000647  |
| 14 | H  | -0.001278 |
| 15 | C  | 0.020892  |
| 16 | H  | -0.000576 |
| 17 | H  | -0.001608 |
| 18 | H  | 0.003239  |
| 19 | C  | 0.028673  |
| 20 | H  | -0.002388 |
| 21 | H  | -0.000331 |
| 22 | H  | 0.002916  |
| 23 | C  | -0.002179 |
| 24 | H  | 0.002718  |
| 25 | H  | -0.000930 |
| 26 | H  | 0.000585  |
| 27 | C  | -0.099082 |
| 28 | C  | -0.072920 |
| 29 | C  | -0.008074 |
| 30 | C  | -0.078546 |
| 31 | C  | -0.097472 |
| 32 | C  | 0.029235  |



|    |   |           |
|----|---|-----------|
| 33 | H | -0.000514 |
| 34 | H | -0.002285 |
| 35 | H | 0.009942  |
| 36 | C | 0.046622  |
| 37 | H | -0.000098 |
| 38 | H | -0.000234 |
| 39 | H | 0.000734  |
| 40 | C | -0.000051 |
| 41 | H | -0.002295 |
| 42 | H | -0.001319 |
| 43 | H | 0.000093  |
| 44 | C | 0.017534  |
| 45 | H | -0.001427 |
| 46 | H | 0.000052  |
| 47 | H | 0.002647  |
| 48 | C | 0.009662  |
| 49 | H | 0.011913  |
| 50 | H | -0.002621 |
| 51 | H | -0.001441 |
| 52 | N | 0.041998  |
| 53 | N | 0.122902  |
| 54 | C | -0.002444 |
| 55 | H | 0.002971  |
| 56 | O | 0.073501  |
| 57 | O | 0.030618  |
| 58 | N | 0.152203  |
| 59 | C | 0.363179  |
| 60 | C | 0.363549  |
| 61 | C | -0.123714 |
| 62 | C | -0.074294 |
| 63 | C | -0.063803 |
| 64 | C | 0.036157  |
| 65 | C | -0.000035 |
| 66 | H | -0.000044 |
| 67 | H | 0.000021  |
| 68 | H | 0.002749  |
| 69 | H | 0.000057  |

Sum of Mulliken spin densities= 4.00000

### Spin populations at UPBEPBE:

Mulliken atomic spin densities:

|   |    |           |
|---|----|-----------|
|   | 1  |           |
| 1 | Cr | 3.482349  |
| 2 | C  | -0.079710 |
| 3 | C  | -0.061431 |
| 4 | C  | -0.019050 |

|    |   |           |
|----|---|-----------|
| 5  | C | -0.049505 |
| 6  | C | -0.045477 |
| 7  | C | 0.003530  |
| 8  | H | 0.000893  |
| 9  | H | -0.000254 |
| 10 | H | 0.001772  |
| 11 | C | 0.011471  |
| 12 | H | 0.002181  |
| 13 | H | 0.000512  |
| 14 | H | -0.001491 |
| 15 | C | 0.024189  |
| 16 | H | -0.000790 |
| 17 | H | -0.001639 |
| 18 | H | 0.002998  |
| 19 | C | 0.030139  |
| 20 | H | -0.002610 |
| 21 | H | -0.000518 |
| 22 | H | 0.002711  |
| 23 | C | 0.001324  |
| 24 | H | 0.002596  |
| 25 | H | -0.000923 |
| 26 | H | 0.000473  |
| 27 | C | -0.099427 |
| 28 | C | -0.073288 |
| 29 | C | -0.013328 |
| 30 | C | -0.074590 |
| 31 | C | -0.097222 |
| 32 | C | 0.030814  |
| 33 | H | -0.000503 |
| 34 | H | -0.001860 |
| 35 | H | 0.008246  |
| 36 | C | 0.046666  |
| 37 | H | -0.000198 |
| 38 | H | -0.000088 |
| 39 | H | 0.000593  |
| 40 | C | 0.002529  |
| 41 | H | -0.002138 |
| 42 | H | -0.001258 |
| 43 | H | 0.000057  |
| 44 | C | 0.022720  |
| 45 | H | -0.001098 |
| 46 | H | 0.000025  |
| 47 | H | 0.002193  |
| 48 | C | 0.015856  |
| 49 | H | 0.010309  |
| 50 | H | -0.002223 |
| 51 | H | -0.001255 |

|    |   |           |
|----|---|-----------|
| 52 | N | 0.040037  |
| 53 | N | 0.119247  |
| 54 | C | -0.003156 |
| 55 | H | 0.002989  |
| 56 | O | 0.072985  |
| 57 | O | 0.031814  |
| 58 | N | 0.148111  |
| 59 | C | 0.346273  |
| 60 | C | 0.359469  |
| 61 | C | -0.117480 |
| 62 | C | -0.061239 |
| 63 | C | -0.054212 |
| 64 | C | 0.037033  |
| 65 | C | 0.000092  |
| 66 | H | -0.000062 |
| 67 | H | 0.000030  |
| 68 | H | 0.002712  |
| 69 | H | 0.000086  |

Sum of Mulliken spin densities= 4.00000

### Spin populations at UTPSSH:

Mulliken atomic spin densities:

|    |    |           |
|----|----|-----------|
|    |    | 1         |
| 1  | Cr | 3.464734  |
| 2  | C  | -0.054405 |
| 3  | C  | -0.044560 |
| 4  | C  | -0.047904 |
| 5  | C  | -0.042815 |
| 6  | C  | -0.038004 |
| 7  | C  | 0.011884  |
| 8  | H  | 0.000870  |
| 9  | H  | 0.000727  |
| 10 | H  | 0.001958  |
| 11 | C  | 0.011298  |
| 12 | H  | 0.002626  |
| 13 | H  | 0.000849  |
| 14 | H  | -0.000066 |
| 15 | C  | 0.019427  |
| 16 | H  | 0.000241  |
| 17 | H  | 0.000004  |
| 18 | H  | 0.003762  |
| 19 | C  | 0.023956  |
| 20 | H  | 0.000871  |
| 21 | H  | -0.000325 |
| 22 | H  | 0.003637  |
| 23 | C  | 0.010978  |

|    |   |           |
|----|---|-----------|
| 24 | H | 0.002765  |
| 25 | H | 0.000957  |
| 26 | H | 0.000540  |
| 27 | C | -0.063604 |
| 28 | C | -0.062070 |
| 29 | C | -0.044298 |
| 30 | C | -0.106347 |
| 31 | C | -0.104426 |
| 32 | C | 0.015345  |
| 33 | H | 0.001561  |
| 34 | H | -0.001529 |
| 35 | H | 0.008415  |
| 36 | C | 0.059519  |
| 37 | H | 0.001095  |
| 38 | H | -0.001258 |
| 39 | H | 0.002935  |
| 40 | C | -0.020066 |
| 41 | H | -0.002158 |
| 42 | H | -0.001029 |
| 43 | H | 0.001698  |
| 44 | C | -0.000268 |
| 45 | H | -0.000443 |
| 46 | H | -0.000173 |
| 47 | H | 0.004056  |
| 48 | C | -0.011148 |
| 49 | H | 0.010281  |
| 50 | H | -0.000032 |
| 51 | H | -0.001941 |
| 52 | N | 0.044756  |
| 53 | N | 0.140977  |
| 54 | C | -0.004794 |
| 55 | H | 0.002717  |
| 56 | O | 0.083690  |
| 57 | O | 0.026843  |
| 58 | N | 0.178566  |
| 59 | C | 0.415879  |
| 60 | C | 0.412997  |
| 61 | C | -0.170125 |
| 62 | C | -0.098821 |
| 63 | C | -0.079362 |
| 64 | C | 0.026171  |
| 65 | C | 0.000083  |
| 66 | H | -0.000061 |
| 67 | H | 0.000003  |
| 68 | H | 0.002342  |
| 69 | H | 0.000021  |

Sum of Mulliken atomic spin densities = 4.00000
